# Supplementary material
Source: Springer Nature journal article supplement (https://cris.unibo.it/retrieve/e1dcb333-35fd-7715-e053-1705fe0a6cc9/12875_2013_873_MOESM2_ESM.pdf)
Supplement: MOESM2 [file 12875_2013_873_MOESM2_ESM.pdf]

PCPs working in Emilia-Romagna Region

**N=3138**

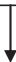

PCPs working in Modena, Reggio Emilia, Bologna or Rimini LHUs

**N=1711**

Males = 70.8%, mean age = 55.5, mean number of attenders = 1255

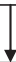

PCPs participating in psychiatric educational meetings and accepting to take part in the study

**N=816**

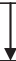

Filled and returned questionnaires

**N=531**

Males = 66.0%, mean age = 53.7, mean number of attenders = 1281
